# Supplementary material for: CD40L mediated alternative NFκB-signaling induces resistance to BCR-inhibitors in patients with mantle cell lymphoma
Source: PubMed Central journal article supplement (PMC5833745; doi:10.1038/s41419-017-0157-6), 2018-01-24

Supplementary Figure 1

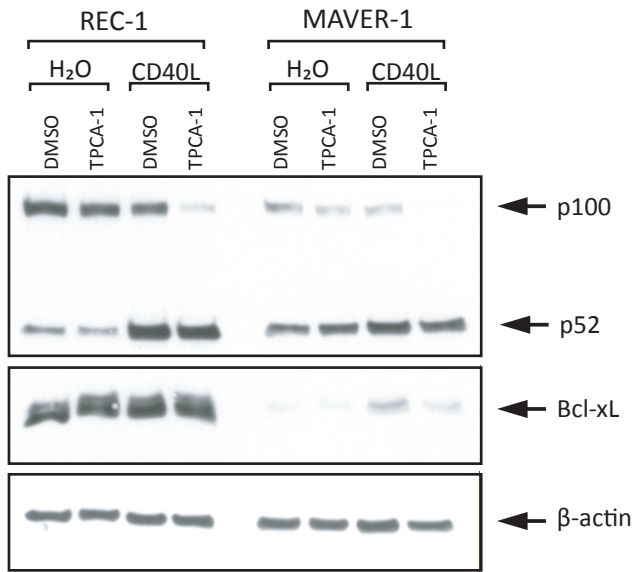

Supplement: 41419_2017_157_MOESM2_ESM.pdf [file 41419_2017_157_MOESM2_ESM.pdf]
